# Supplementary material for: FGF21 Depletion Attenuates Colitis through Intestinal Epithelial IL-22-STAT3 Activation in Mice
Source: MDPI journal article supplement (doi:10.3390/nu15092086), 2023-04-26
Supplement: s1 [file s1]

# FGF21 Depletion Attenuates Colitis through Intestinal Epithelial IL-22-STAT3 Activation in Mice

Liming Liu <sup>1,2</sup>, Fengyuan Li <sup>2,3</sup>, Tuo Shao <sup>2</sup>, Lihua Zhang <sup>2</sup>, Jiyeon Lee <sup>2,3</sup>, Gerald Dryden <sup>2</sup>,  
Craig J. McClain <sup>2,3,4,5,6</sup>, Cuiqing Zhao <sup>1,2,\*</sup> and Wenke Feng <sup>2,3,4,5,\*</sup>

<sup>1</sup> College of Animal Science and Technology, Jilin Agricultural Science and Technology University, Jilin 132101, China; aliuliming1984@126.com

<sup>2</sup> Department of Medicine, University of Louisville, Louisville, KY 40202, USA; fengyuan.li@louisville.edu (F.L.); tuoshao89@gmail.com (T.S.); lihua.zhang@louisville.edu (L.Z.); jiyeon.lee@louisville.edu (J.L.); gerald.dryden@louisville.edu (G.D.); craig.mcclain@louisville.edu (C.J.M.)

<sup>3</sup> Department of Pharmacology & Toxicology, University of Louisville, Louisville, KY 40202, USA

<sup>4</sup> Hepatobiology & Toxicology Center, University of Louisville, Louisville, KY 40202, USA

<sup>5</sup> Alcohol Research Center, University of Louisville, Louisville, KY 40202, USA

<sup>6</sup> Robley Rex VA Medical Center, Louisville, KY 40206, USA

\* Correspondence: yuqing53@163.com (C.Z.); wenke.feng@louisville.edu (W.F.); Tel.: +86-0432-6470-3108 (C.Z.); +1-502-852-2920 (W.F.)

## Supplementary Figures

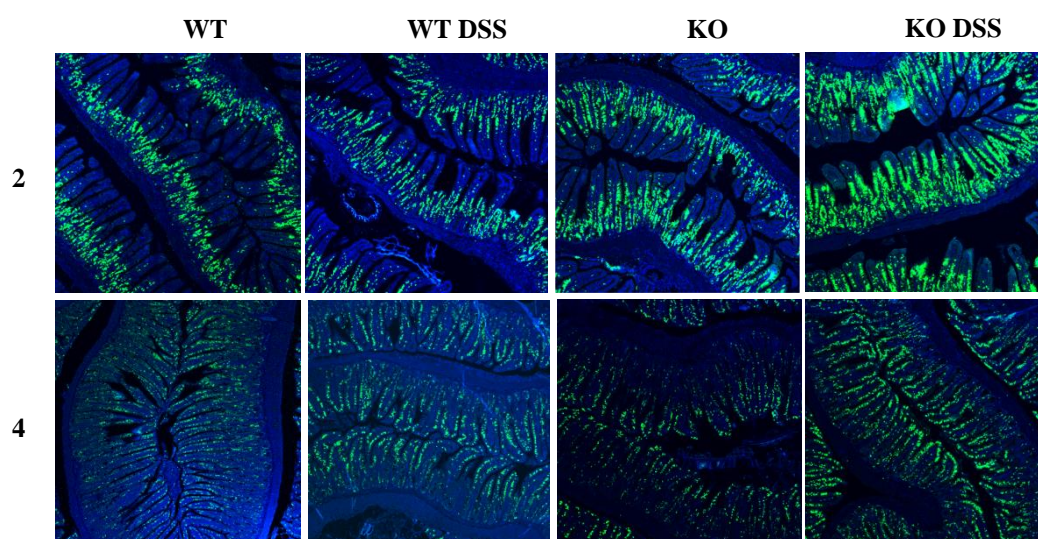

**Figure S1.** FGF21 KO mice display enhanced intestinal epithelial cell proliferation responses upon DSS treatment. Representative BrdU staining of colonic tissues.

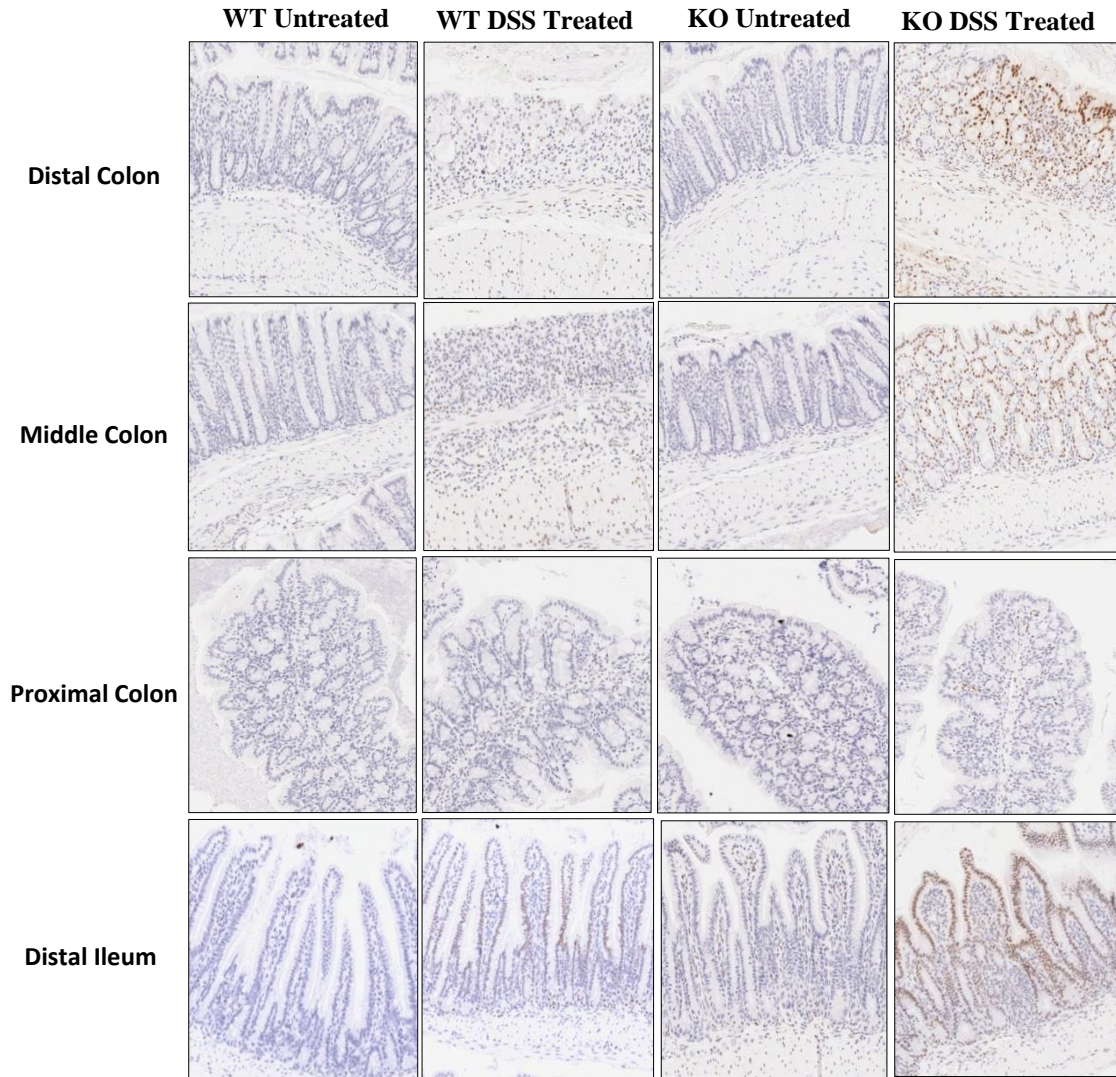

**Figure S2.** DSS treatment enhances mucosal expression of phosphor-Stat3 in FGF21 KO mice. WT and FGF21 KO mice were either untreated or treated with 2.5% DSS for 7 days.

(A) Immunohistochemical analysis of phosphor-Stat3 (p-Stat3) of the colonic and ileal tissue.
